# Supplementary material for: Representation of molecular structures with persistent homology for machine learning applications in chemistry
Source: PubMed Central journal article supplement (PMC7319956; doi:10.1038/s41467-020-17035-5), 2020-06-26
Supplement: 41467_2020_17035_MOESM1_ESM.pdf [file 41467_2020_17035_MOESM1_ESM.pdf]

## **SUPPLEMENTARY INFORMATION**

**Representation of Molecular Structures with Persistent Homology for Machine Learning  
Applications in Chemistry**

**Townsend *et al.***

## Supplementary Note 1. Application of Persistent Homology on Molecular Systems

For each molecule, persistence diagrams associated with connected components and holes are computed using the Vietoris-Rips complex using the Ripser python package.<sup>13</sup> The persistence diagrams use  $(birth, persistence)$  coordinates of the respective atoms, where  $persistence = death - birth$  represents the length of the lifetime ( $persistence$ ) of a homological feature.

Once the persistent diagrams have been constructed, we generate the persistent images (PIs) by considering for each point in the diagram the additive Gaussian  $(birth, persistence) + N(0, \sigma^2 \cdot SF_{ij})$ , where  $N$  is the normal distribution. For points on the diagram associated to connected components, this variance is scaled by the difference in electronegativity between the atoms  $i$  and  $j$ , given by the following formula:

$$SF_{ij} = \frac{|EN_i - EN_j| + \varepsilon}{10}, \quad (1)$$

where  $EN_i$  and  $EN_j$  represent the electronegativity of atoms  $i$  and  $j$ . The parameter  $\varepsilon$  of the scaling factor  $SF_{ij}$  prevents the variance from becoming zero when atoms  $i$  and  $j$  are equivalent. A value of  $\varepsilon = 0.4$  was found to be the optimal. These scaling factors modify the default Gaussian variance, for which we found that  $\sigma^2 = 0.08$  to perform best for this application. For holes, no scaling based on electronegativity was necessary ( $SF_{ij} = 1$ ), and a variance of  $\sigma^2 = 0.08$  was used.

The points of each persistence diagram along with the variances assigned to each point, are then input in a modified version of the Persim python package.<sup>14</sup> The code is changed to use fixed boundaries for the persistence vectors and images. Persistence vectors are then calculated over the interval from -0.1 to the 2.5 of the persistence values. The variance corresponding to each point is then used as the variance for the Gaussian centered at that point for the persistence vector or image. Persistence vectors are discretized into 150 horizontal and vertical pixels to form the persistence images, corresponding to vector length of 22500. No weighting function was used in the calculations of the persistence vectors or persistence images.

## Supplementary Note 2. Similar-size Representation of Persistent Images

A numerical example is given that describes the similar-size molecular representation that the persistence images (PI) offer and compared to the bag-of-bonds (BoB) method. For demonstrating this feature of the PI, which is a smeared version of a persistence diagram (PD), we compare the dimensions of these two representations for a small molecule (anisole), a medium-size molecule (4-*tert*-butylcalix[4]arene, Supplementary Figure 1), and a large enzyme (main protease in complex with an inhibitor N3 of COVID-19). Anisole is composed by 16 atoms, thus, the Coulomb matrix that is constructed for BoB is of 16x16 size. 4-*tert*-butylcalixarene has 104 atoms, thus the same matrix will be of 104x104 dimension. On the contrary, a PD for anisole has 3x3 dimension (Figure 1 from main text), while a PD for a calixarene slightly increases to a 4x4 representation (Supplementary Figure 1 (c), highest birth value is 3.93). Thus, the amount of padding (i.e. adding zeros) is significantly smaller. Similarly, the PD of the main protease in complex with an inhibitor N3 of the new coronavirus (CoV) identified as COVID-19 is shown in Supplementary Figure 2. The crystal structure of the complex was used.<sup>15</sup> For simplicity, the hydrogen atoms were omitted, leading to a biomolecule with 2500 atoms (2367 atoms from protease, 49 from inhibitor, and 84 oxygen atoms of water molecules). The Coulomb matrix will have 2500x2500 size, while the PD has a significantly smaller dimension (4Åx6Å), which is comparable with the PDs of anisole and calixarene.

**Note:** Our code, representative examples, and all structures in xyz format can be conveniently downloaded at [https://gitlab.com/voglab/PersistentImages\\_Chemistry](https://gitlab.com/voglab/PersistentImages_Chemistry)

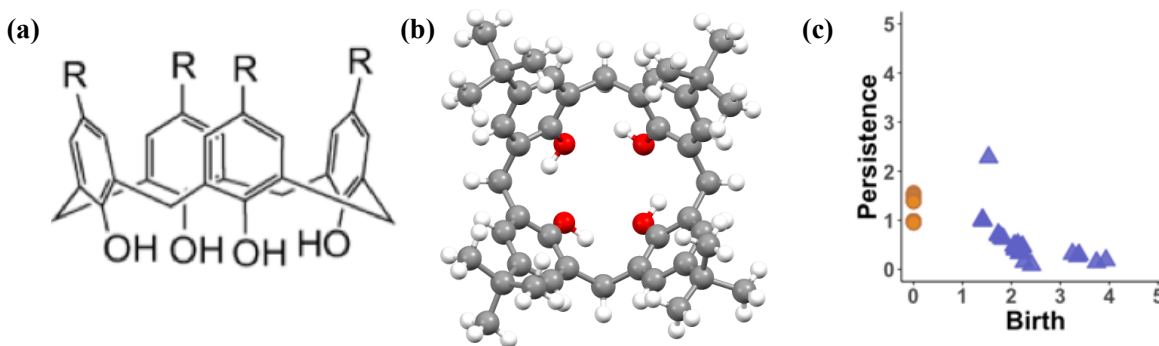

Supplementary Figure 1. (a) Structural formula and (b) ball-and-stick model of 4-*tert*-butylcalix[4]arene (R = *tert*-butyl groups). (c) The persistent diagram of the 4-*tert*-butylcalix[4]arene. Note that the highest birth value of a one-dimensional hole is 3.93.

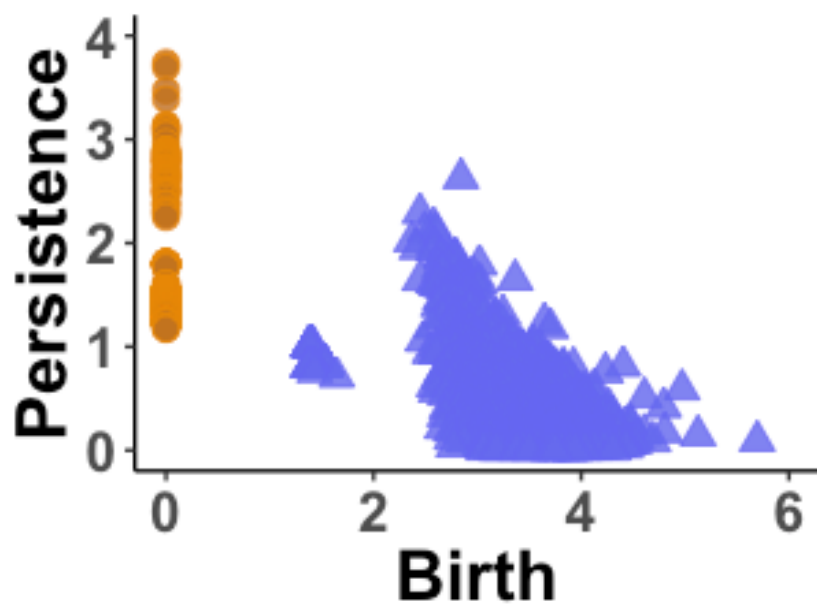

Supplementary Figure 2: The persistent diagram of the COVID-19 main protease in complex with an inhibitor N3 (hydrogen atoms are omitted).

### **Supplementary Note 3. Molecular Subset Selection**

To demonstrate the applicability of the novel molecular fingerprinting method, a dataset containing 100 organic aromatic molecules was compiled. All molecules considered here are composed of C, O, N, F, S and H atoms. The interaction energies of each molecule with CO<sub>2</sub> and N<sub>2</sub> were computed by combining molecular dynamics simulations and density functional theory (DFT) for the screening of different conformers and interaction sites<sup>1</sup>, and are summarized in Supplementary Notes 4 and 5.

## Supplementary Note 4. Molecular Dynamics Conformation Search

The conformational prescreening step offers an automated conformation search between competitive local minima of the full potential energy surface. An example of competitive binding sites is given for 7-methyl-imidazopyridine (imidazopyridamine, structure 10 of the 100-molecule dataset) in Supplementary Figure 3. Prescreening of the conformational space with molecular dynamics simulations provided many unbiased initial geometries which were further optimized by DFT. Although interaction energies are calculated at the DFT level, which entails a thorough conformational search to determine the most favorable binding site of a respective gas with the structure, only the structure in the absence of the interacting gas is passed to the molecular representation. Therefore, the ML algorithm will infer the interaction energy of the most favorable binding site without any explicit knowledge of the gas, therefore bypassing the need of intensive conformational searches at the time of prediction. These structures were generated in a 16 Angstrom box at 200 K in the NVT ensemble with a Nose-Hoover thermostat using a 1.0 ps time-constant and a 1.0 fs time-step. The OPLS-AA force field<sup>2</sup> was used, where LigParGen<sup>3</sup> was applied for the generation of force-field input implemented in the LAMMPS software package<sup>4</sup> Thirty structures were considered for each functional group (monomer) and monomer-gas supersystems, resulting in a total  $3*30*100 = 9000$  DFT geometry optimizations.

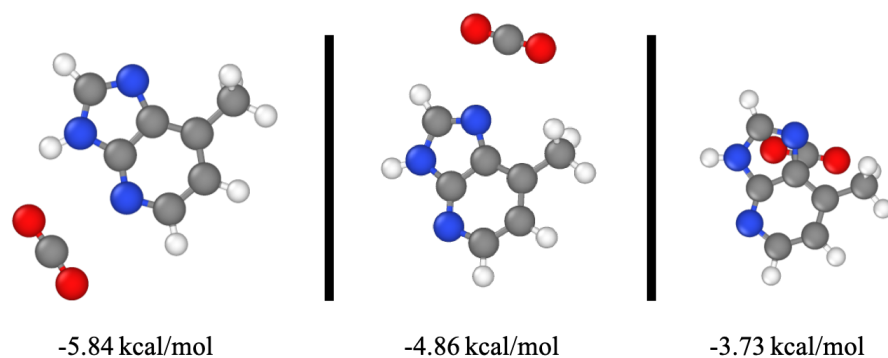

Supplementary Figure 3. Three different conformations of 7-methyl-imidazopyridine with CO<sub>2</sub>. Each binding site has considerably different interaction energies, which demonstrates the importance of sufficient sampling of conformations.

## Supplementary Note 5. Density Functional Theory Calculations

All DFT calculations were performed with the TURBOMOLE 7.2 program package<sup>5</sup> using the PBE0 functional<sup>6</sup> with the def2-TZVPP basis set<sup>7</sup>. Grimme's D3 dispersion correction<sup>8</sup> with the Becke-Johnson damping function<sup>9</sup> was included to account for dispersion effects. The choice of the PBE0-D3(BJ)/def2-TZVPP level of theory was chosen based on benchmark studies between functional groups and CO<sub>2</sub>.<sup>10,11</sup> Integral evaluations were performed with an ultrafine grid, where the resolution of identity was utilized in the computations of two-electron integrals.<sup>12</sup> All DFT geometry optimizations were performed with tight convergence criteria, and frequency calculations were performed on structures to ensure they are minima on the potential energy surface. Interaction energies  $\Delta E_{Int}$  between a gas molecule with a functional group were calculated as:

$$\Delta E_{Int} = E_{Organic-Gas} - E_{Organic} - E_{Gas}$$

where  $E_{Organic-Gas}$  represents the energy of the organic-gas molecular supersystem, while  $E_{Organic}$  and  $E_{Gas}$  represent the energies of the relaxed isolated organic and gas molecules, respectively.

## Supplementary Note 6. Testing of Different Molecular Representations and Machine Learning Methods

The SciKitLearn<sup>16</sup> package was used for the machine learning. The following acronyms will be used for the learners:

Supplementary Table 1. Acronyms for learners corresponding to the SciKitLearn package

|                  |                                                 |
|------------------|-------------------------------------------------|
| RF               | RandomForestRegressor                           |
| GPR              | GaussianProcessRegressor<br>(Matern 5/2 kernel) |
| KRR linear       | KernelRidge(kernel='linear')                    |
| KRR RBF          | KernelRidge(kernel='rbf')                       |
| KRR<br>Laplacian | KernelRidge(kernel='laplacian')                 |

Smooth Overlap of Atomic Positions<sup>17</sup> representations were created using the dscribe<sup>18</sup> program package. SOAP feature vectors are atomistic, therefore a transformation is necessary for molecular analyses. The REMatch kernel was used to find similarity of local environments of molecules as implemented in dscribe.<sup>19</sup> An 8.0 Å cutoff was used in the generations of the SOAP representation, with 4 radial basis functions (nmax=4) and a maximum degree of spherical harmonics of 4 (lmax=4). The REMatch Kernel was implemented with a Gaussian kernel with default hyperparameters (gamma=1, alpha=1).

The BoB<sup>20</sup>, CM<sup>21</sup>, and FCHL<sup>22</sup> representations were generated in QML.<sup>23</sup> For the FCHL representation, kernel ridge regression within QML was used for prediction. The python package Ripser<sup>13</sup> was used for the generation of persistence diagrams (PDs). The persistence images were generated with a modified version of the persim python package.<sup>14</sup> Catenated persistence images (PIs) were created with 150 horizontal and vertical pixels, corresponding to feature vectors of length 22,500. 0 and 1-dim features on the PD were placed on a single persistence image, ranging from -0.1 to 2.5 Å along the image. The negative x-limit was included to allow the 0-dim gaussians to fully extend without truncation.

Timings are reported in seconds of calculation time to predict the interaction energies of the entire GDB-9 database on an i5-4278U processor. Times are reported for CO<sub>2</sub> interactions only, as the timings are equivalent because the representations are unchanged.



Supplementary Table 2. 10-fold cross validation RMSE and standard deviations, timings, and optimized hyperparameters for Coulomb Matrix (CM) Representation for the prediction of CO<sub>2</sub> Interaction Energies

| CM                      | RF     | GPR      | KRR linear | KRR RBF  | KRR Laplacian |
|-------------------------|--------|----------|------------|----------|---------------|
| Average RMSE (kcal/mol) | 0.67   | 0.64     | 0.76       | 0.73     | <b>0.63</b>   |
| SD                      | 0.13   | 0.10     | 0.10       | 0.14     | 0.09          |
| Alpha                   | N/A    | 2.15E-01 | 3.24E+00   | 1.21E-01 | 3.59E-02      |
| Gamma                   | N/A    | N/A      | N/A        | 2.22E-03 | 4.64E-03      |
| Time (s)                | 190.56 | 196.54   | 125.72     | 165.73   | 150.46        |

Supplementary Table 3. 10-fold cross validation RMSE and standard deviations, timings, and optimized hyperparameters for Bag of Bonds Representation for the prediction of CO<sub>2</sub> Interaction Energies

| BoB                     | RF   | GPR         | KRR linear | KRR RBF  | KRR Laplacian |
|-------------------------|------|-------------|------------|----------|---------------|
| Average RMSE (kcal/mol) | 0.54 | <b>0.52</b> | 0.58       | 0.67     | 0.53          |
| SD                      | 0.15 | 0.10        | 0.10       | 0.27     | 0.09          |
| Alpha                   | N/A  | 1.00E-01    | 4.29E+00   | 4.18E-03 | 4.94E-03      |
| Gamma                   | N/A  | N/A         | N/A        | 2.15E-03 | 5.18E-04      |
| Time (s)                | 122  | <b>191</b>  | 91         | 97       | 120           |

Supplementary Table 4. 10-fold cross validation RMSE and standard deviations, timings, and optimized hyperparameters for the Persistence Images for the prediction of CO<sub>2</sub> Interaction Energies

| PI                      | RF   | GPR      | KRR linear | KRR RBF  | KRR Laplacian |
|-------------------------|------|----------|------------|----------|---------------|
| Average RMSE (kcal/mol) | 0.49 | 0.51     | 0.63       | 0.50     | <b>0.44</b>   |
| SD                      | 0.12 | 0.13     | 0.15       | 0.10     | 0.09          |
| Alpha                   | N/A  | 4.64E-02 | 1.67E-01   | 5.99E-03 | 2.15E-07      |
| Gamma                   | N/A  | N/A      | N/A        | 4.64E-02 | 3.59E-02      |
| Time (s)                | 1571 | 2091     | 1595       | 1515     | <b>2219</b>   |

Supplementary Table 5. 10-fold cross validation RMSE and standard deviations, timings, and optimized hyperparameters for the FCHL representation for the prediction of CO<sub>2</sub> Interaction Energies

| FCHL                    | KRR RBF      |
|-------------------------|--------------|
| Average RMSE (kcal/mol) | <b>0.50</b>  |
| SD                      | 0.10         |
| Sigma                   | 1750         |
| Lambda                  | 1.00E-08     |
| Time (s)                | <b>46782</b> |

Supplementary Table 6. 10-fold cross validation RMSE and standard deviations, Timings, and optimized hyperparameters for the SOAP representation for the prediction of CO<sub>2</sub> Interaction Energies

| SOAP                    | RF    | GPR      | KRR linear   | KRR RBF  | KRR Laplacian |
|-------------------------|-------|----------|--------------|----------|---------------|
| Average RMSE (kcal/mol) | 0.69  | 0.67     | <b>0.41</b>  | 0.50     | 0.68          |
| SD                      | 0.12  | 0.13     | 0.11         | 0.08     | 0.13          |
| Alpha                   | N/A   | 7.74E-02 | 6.55E-06     | 5.99E-05 | 6.83E-01      |
| Gamma                   | N/A   | N/A      | N/A          | 4.64E-03 | 3.59E-03      |
| Time (s)                | 94981 | 94745    | <b>88287</b> | 89263    | 92295         |

Supplementary Table 7. 10-fold cross validation RMSE and standard deviations and optimized hyperparameters for Coulomb Matrix Representation for the prediction of N<sub>2</sub> Interaction Energies

| CM                      | RF   | GPR         | KRR linear | KRR RBF  | KRR Laplacian |
|-------------------------|------|-------------|------------|----------|---------------|
| Average RMSE (kcal/mol) | 0.23 | <b>0.22</b> | 0.27       | 0.29     | 0.24          |
| SD                      | 0.06 | 0.06        | 0.09       | 0.15     | 0.07          |
| Alpha                   | N/A  | 2.15E-02    | 1.84E+00   | 7.20E-03 | 2.12E-03      |
| Gamma                   | N/A  | N/A         | N/A        | 1.46E-01 | 2.22E-04      |

Supplementary Table 8. 10-fold cross validation RMSE and standard deviations and optimized hyperparameters for Bag of Bonds Representation for the prediction of N<sub>2</sub> Interaction Energies

| BoB                     | RF   | GPR         | KRR linear | KRR RBF  | KRR Laplacian |
|-------------------------|------|-------------|------------|----------|---------------|
| Average RMSE (kcal/mol) | 0.23 | <b>0.22</b> | 0.27       | 0.27     | 0.24          |
| SD                      | 0.06 | 0.06        | 0.09       | 0.09     | 0.08          |
| Alpha                   | N/A  | 2.15E-02    | 2.02E+00   | 4.64E-04 | 3.59E-03      |
| Gamma                   | N/A  | N/A         | N/A        | 5.99E-05 | 7.74E-04      |

Supplementary Table 9. 10-fold cross validation RMSE and standard deviations and optimized hyperparameters for Persistence Image Representation for the prediction of N<sub>2</sub> Interaction Energies

| PI                      | RF   | GPR      | KRR linear | KRR RBF  | KRR Laplacian |
|-------------------------|------|----------|------------|----------|---------------|
| Average RMSE (kcal/mol) | 0.22 | 0.23     | 0.33       | 0.23     | <b>0.22</b>   |
| SD                      | 0.06 | 0.07     | 0.09       | 0.08     | 0.06          |
| Alpha                   | N/A  | 7.74E-03 | 2.15E-01   | 1.00E-02 | 1.00E-04      |
| Gamma                   | N/A  | N/A      | N/A        | 4.64E-02 | 4.64E-02      |

Supplementary Table 10. 10-fold cross validation RMSE and standard deviations optimized hyperparameters for the FCHL representation for the prediction of N<sub>2</sub> Interaction Energies

| FCHL                    | KRR RBF     |
|-------------------------|-------------|
| Average RMSE (kcal/mol) | <b>0.22</b> |
| SD                      | 0.04        |
| Sigma                   | 2000        |
| Lambda                  | 1.00E-08    |

Supplementary Table 11. 10-fold cross validation RMSE and standard deviations and optimized hyperparameters for the SOAP Representation for the prediction of N<sub>2</sub> Interaction Energies

| SOAP                    | RF   | GPR      | KRR linear | KRR RBF     | KRR Laplacian |
|-------------------------|------|----------|------------|-------------|---------------|
| Average RMSE (kcal/mol) | 0.32 | 0.28     | 0.21       | <b>0.20</b> | 0.30          |
| SD                      | 0.07 | 0.07     | 0.05       | 0.04        | 0.07          |
| Alpha                   | N/A  | 2.15E-02 | 2.12E-04   | 7.74E-08    | 5.99E-07      |
| Gamma                   | N/A  | N/A      | N/A        | 7.74E-05    | 1.29E-02      |

## Supplementary Note 7. N<sub>2</sub> Deviations from Different Molecular Representation Schemes

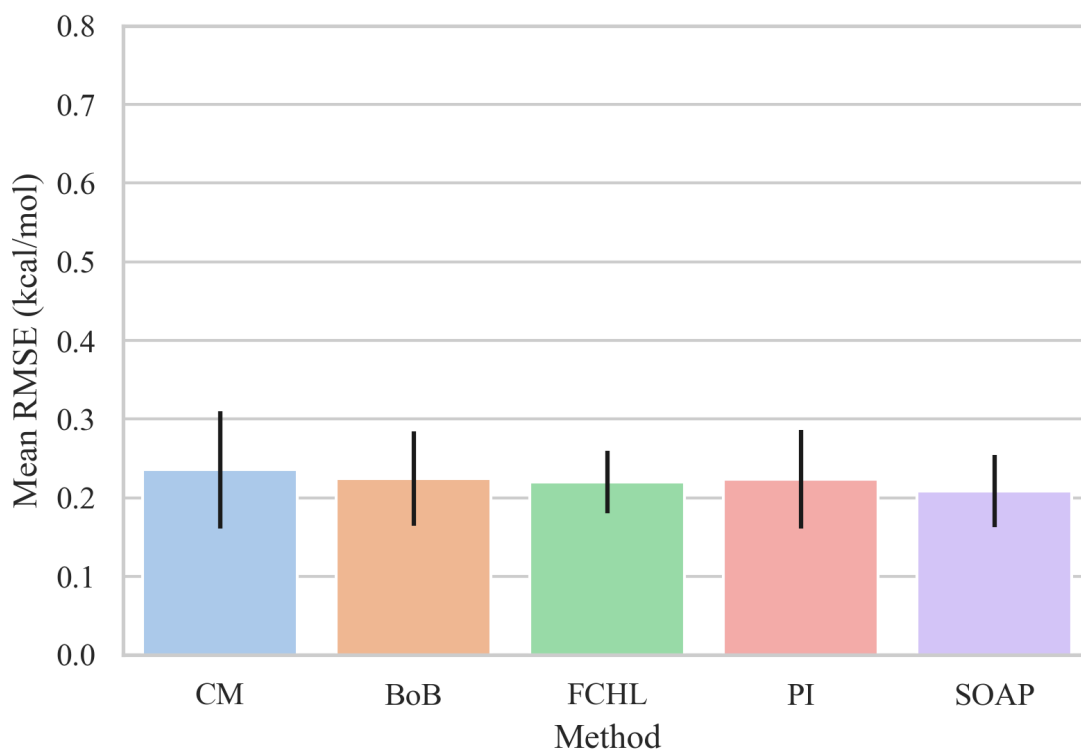

Supplementary Figure 4. Average RMSE (in kcal/mol) using 10-fold CV on N<sub>2</sub> interaction energies for Coulomb Matrices (CM), Bag of Bonds (BoB), FCHL representation, Persistence Images (PI), and Smooth Overlap of Atomic Positions (SOAP) representations. The error bars represent the standard deviation of the RMSE. Overall, all models show similar behavior due to the small range of output values since N<sub>2</sub> interaction energies range roughly between -1.6 and -2.6 kcal/mol.

## Supplementary Note 8. Active Learning

The performance of each respective ML models was evaluated with 10-fold cross validation, which partitions the data into 10 sets, where each of the 10 sets is used as the test set once while the other 9 serve as training. This technique provides a metric for the performance of the model on unseen data. All of the data is passed into the test set once, and the mean root mean squared error (RMSE) of the predictions on the test set are used to evaluate model performance. To ensure the ML-model contains sufficient data to accurately interpolate between the DFT-studied set and the GDB-9 database, active learning was utilized, where the training set is expanded to capture missing information from the previous training data set. The dataset was dynamically expanded by including the top 40 molecules with respect to ML-predicted CO<sub>2</sub> interaction strength and further investigated by the MD/DFT scheme described in the computational details (Supplementary Notes 4 and 5). Therefore, active learning provides a systematic expansion of the training set tailored towards molecules with high CO<sub>2</sub> interaction strength. This process was performed four times, considering the four different molecular representations discussed in the manuscript (CM, BoB, SOAP, PI). The active learning steps for each representation were performed with the most accurate learner, as it was found in Supplementary Note 6, i.e. KRR (Laplacian) for CM and PI, GRP for BoB, and KRR (linear) for SOAP.

Supplementary Table 12: Mean, median and top cases (stronger CO<sub>2</sub> interaction energy than -6.0 kcal/mol) for the top-40 structures per active learning iteration for the four different molecular representations examined in this study.

| Method                    |        | CM    | BoB   | SOAP  | PI           |
|---------------------------|--------|-------|-------|-------|--------------|
| 1 <sup>st</sup> Iteration | Mean   | -4.92 | -4.64 | -5.78 | -5.67        |
|                           | Median | -4.74 | -4.65 | -5.82 | -5.81        |
|                           | Top    | 3     | 2     | 16    | 10           |
| 2 <sup>nd</sup> Iteration | Mean   | -4.91 | -5.22 | -5.84 | -6.32        |
|                           | Median | -4.76 | -5.20 | -5.83 | -6.46        |
|                           | Top    | 1     | 4     | 15    | 33           |
| 3 <sup>rd</sup> Iteration | Mean   | -4.84 | -4.76 | -5.88 | -6.35        |
|                           | Median | -4.89 | -4.64 | -6.01 | -6.57        |
|                           | Top    | 2     | 2     | 20    | 32           |
| Overall                   | Mean   | -4.89 | -4.88 | -5.83 | <b>-6.11</b> |
|                           | Median | -4.77 | -4.77 | -5.85 | <b>-6.32</b> |
|                           | Top    | 6     | 8     | 51    | <b>75</b>    |

Predicted CO<sub>2</sub>/N<sub>2</sub> interaction energies from the BoB with the GRP machine learning algorithm provided unphysical distributions, as it is shown on Supplementary Figure 5(a). In order to examine if the source of error was the choice of the learner or the quality of the training data, we screened the GDB-9 database with the BoB representation, the GPR learner, and data obtained from the CM active learning steps. This scheme also provided erroneous results (Supplementary Figure 5(b)), but more reasonable N<sub>2</sub> distribution. On the contrary, when we screened the same database with the BoB representation, the KRR (linear kernel) learner and the data obtained from the BoB active learning steps, the expected CO<sub>2</sub>/N<sub>2</sub> distributions were recovered (Supplementary Figure 5(c)). Thus, we conclude that an overfitting towards the training set was due to the GPR

learner, and slightly better distributions were obtained when more balanced data were used (active learning with KRR/CM).

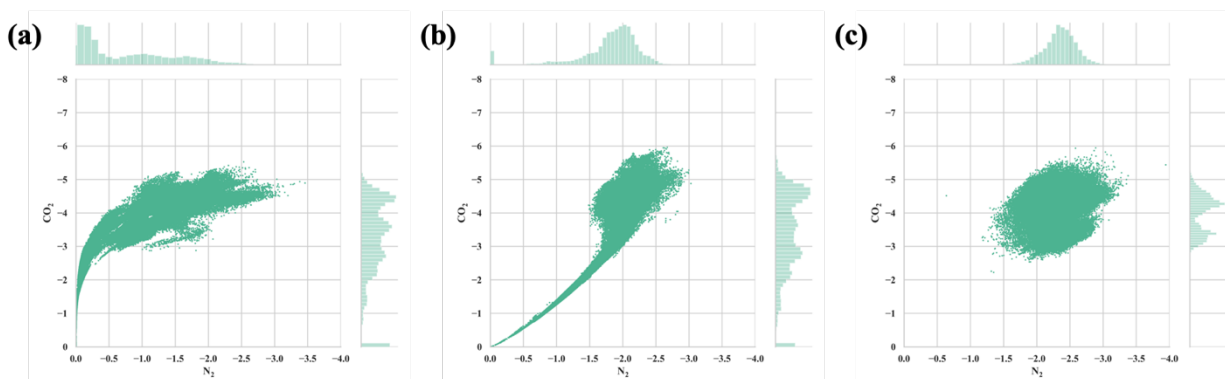

Supplementary Figure 5: Predicted  $\text{CO}_2$  and  $\text{N}_2$  interaction energies (in kcal/mol) for all molecules in the GDB-9 database using the BoB molecular representation and (a) the GRP learner with data from the BoB active learning steps, (b) the GRP learner with data from the CM active learning steps, and (c) the KRR (linear) with data from the BoB active learning steps.

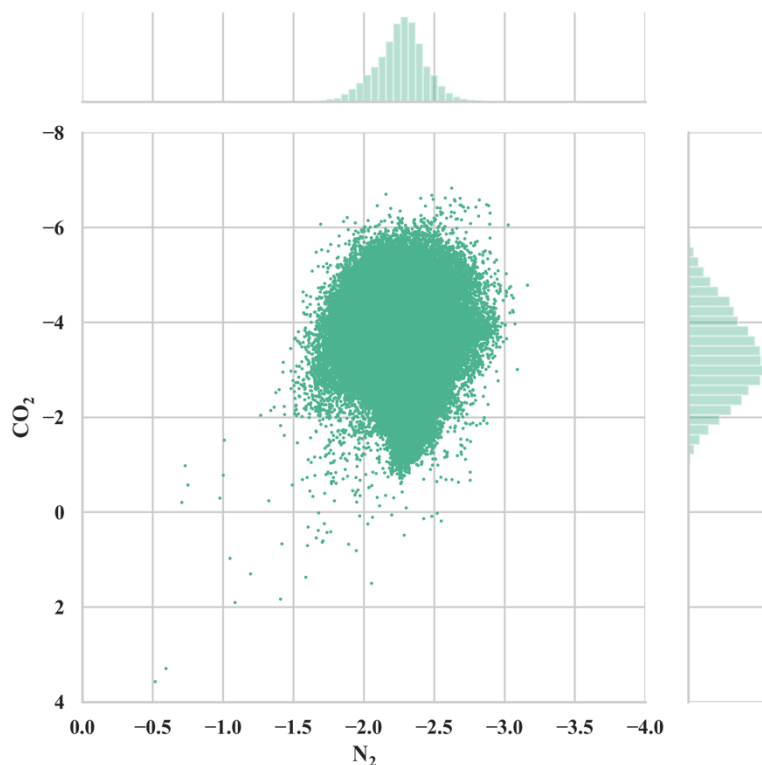

Supplementary Figure 6: Predicted  $\text{CO}_2$  and  $\text{N}_2$  interaction energies (in kcal/mol) for all molecules in the GDB-9 database using the SOAP molecular representation. Notice the erroneous predictions for organic molecules with repulsive interaction with  $\text{CO}_2$  (positive interaction energies).

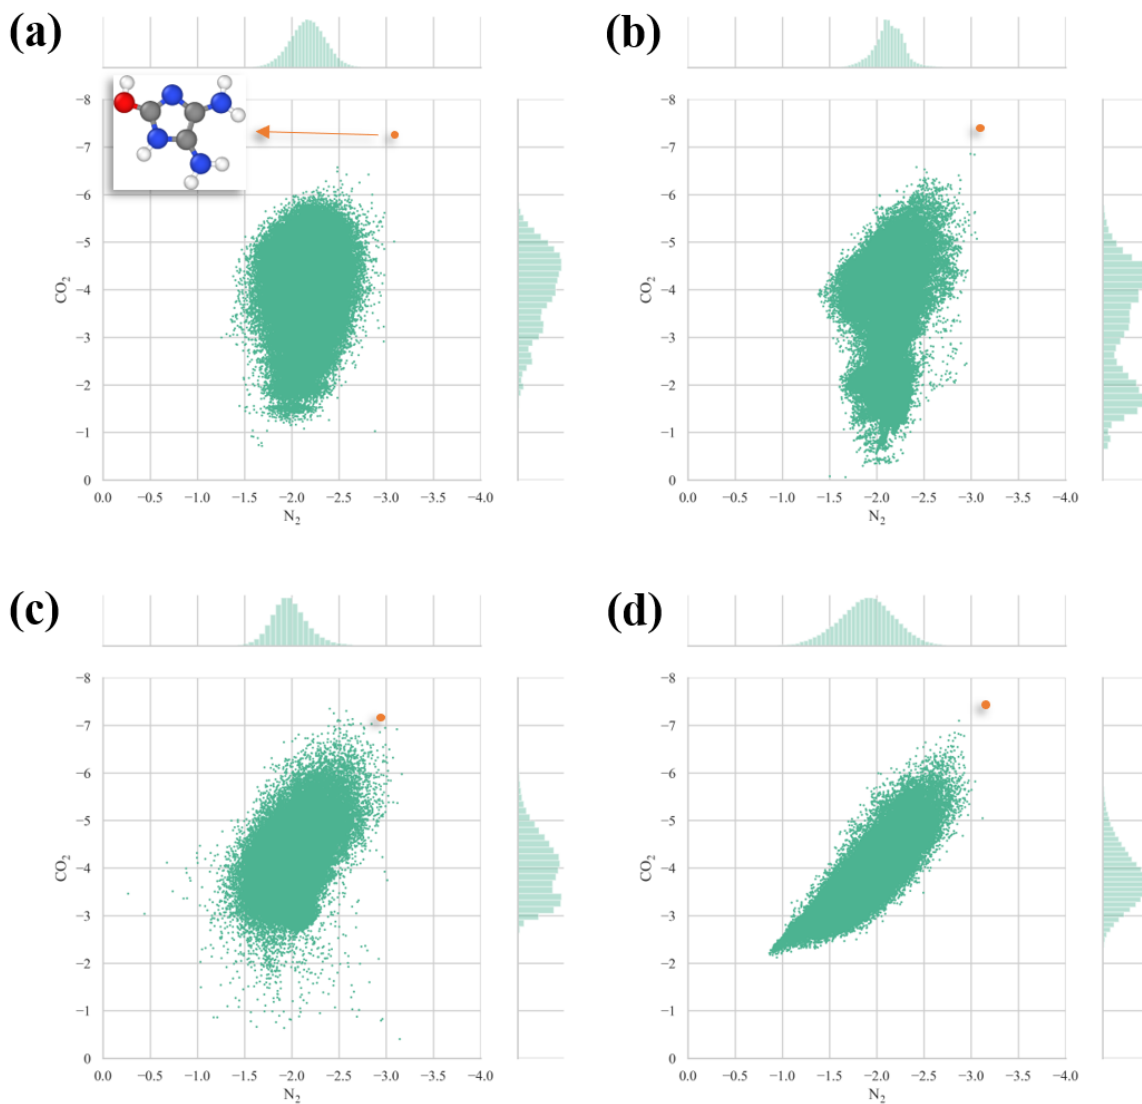

Supplementary Figure 7: Predicted CO<sub>2</sub> and N<sub>2</sub> interaction energies (in kcal/mol) for all molecules in the GDB-9 database using four molecular representation models: (a) CM, (b) BoB, (c) SOAP, and (d) PI. The training of each model was performed with data collected from the PI active learning steps and the same learner (random forest). All models were able to identify 4,5-diamino-1H-imidazol-2-ol (inset) as the strongest CO<sub>2</sub>-philic groups (shown with an orange dot on each plot).



## Supplementary Note 9. Interaction Energies and Structures for 100 Initial Molecules

Supplementary Table 13. 100 Initial Molecules used for the generation of ML models, their DFT interaction energies with CO<sub>2</sub> and N<sub>2</sub>, the iteration of active learning they were introduced to the model, and a depiction of their chemical structure (made in RDKit, displayed formal charges may have inaccuracies)

| Molecule # | CO <sub>2</sub> Interaction Energy | N <sub>2</sub> Interaction Energy | Structure                                                                                                                                                                                                                                                                    |
|------------|------------------------------------|-----------------------------------|------------------------------------------------------------------------------------------------------------------------------------------------------------------------------------------------------------------------------------------------------------------------------|
| 1          | -4.58                              | -1.75                             | 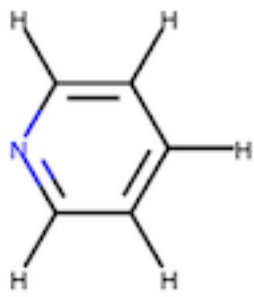<br>Chemical structure of Imidazole, a five-membered aromatic heterocycle consisting of two nitrogen atoms and three carbon atoms, with two hydrogen atoms attached to the carbon atoms.   |
| 2          | -4.12                              | -1.57                             | <br>Chemical structure of Imidazole, a five-membered aromatic heterocycle consisting of two nitrogen atoms and three carbon atoms, with two hydrogen atoms attached to the carbon atoms.  |
| 3          | -4.02                              | -1.60                             | <br>Chemical structure of Imidazole, a five-membered aromatic heterocycle consisting of two nitrogen atoms and three carbon atoms, with two hydrogen atoms attached to the carbon atoms. |

|   |       |       |                                                                                     |
|---|-------|-------|-------------------------------------------------------------------------------------|
| 4 | -4.08 | -1.70 | 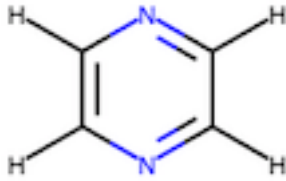  |
| 5 | -3.65 | -1.32 |    |
| 6 | -4.57 | -1.86 |   |
| 7 | -3.99 | -2.24 |  |

|    |       |       |                                                                                      |
|----|-------|-------|--------------------------------------------------------------------------------------|
| 8  | -5.49 | -2.26 | 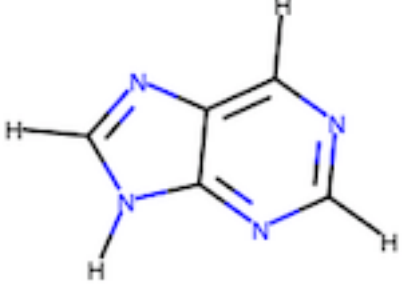   |
| 9  | -5.73 | -2.19 |    |
| 10 | -5.84 | -2.19 |   |
| 11 | -5.60 | -2.25 |  |

|    |       |       |                                                                                                                                                                                                                                                                                                                                                        |
|----|-------|-------|--------------------------------------------------------------------------------------------------------------------------------------------------------------------------------------------------------------------------------------------------------------------------------------------------------------------------------------------------------|
| 12 | -2.64 | -1.82 | 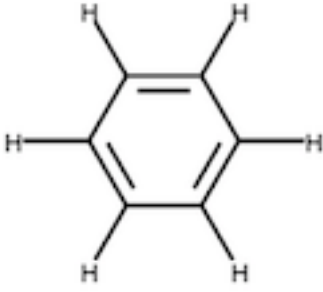 <p>The structure shows a benzene ring with six carbon atoms and six hydrogen atoms. The nitrogen atom is not present in this structure.</p>                                                                                                                         |
| 13 | -4.75 | -1.99 |  <p>The structure shows a pyridine ring with a nitrogen atom at the top position. The nitrogen atom is highlighted in blue. There are five hydrogen atoms attached to the ring carbons.</p>                                                                          |
| 14 | -4.34 | -2.19 |  <p>The structure shows a pyridine ring with a nitrogen atom at the top position, highlighted in blue. There are two methyl groups (CH<sub>3</sub>) attached to the ring at the 2 and 6 positions. There are four hydrogen atoms attached to the ring carbons.</p> |

|    |       |       |                                                                                      |
|----|-------|-------|--------------------------------------------------------------------------------------|
| 15 | -4.43 | -2.29 | 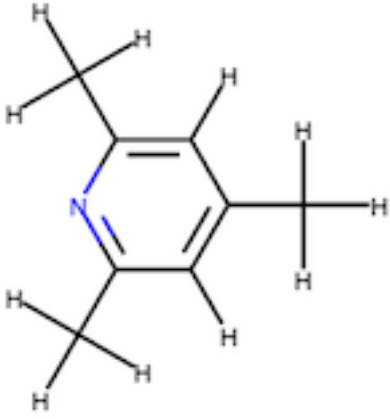   |
| 16 | -4.74 | -2.18 |   |
| 17 | -5.64 | -2.22 |  |
| 18 | -6.07 | -2.21 |  |

|    |       |       |                                                                                                                                                                                                                                                                                           |
|----|-------|-------|-------------------------------------------------------------------------------------------------------------------------------------------------------------------------------------------------------------------------------------------------------------------------------------------|
| 19 | -4.79 | -1.86 | 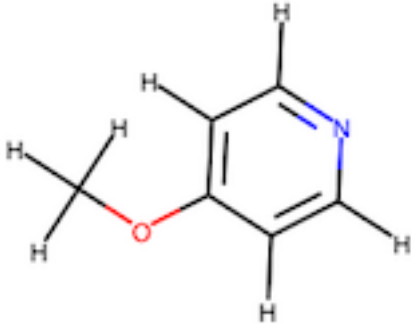 <p>Chemical structure of 2-methylimidazole, showing a five-membered imidazole ring with a methyl group attached to the C2 position. The nitrogen atom is highlighted in blue.</p>                      |
| 20 | -3.79 | -2.01 |  <p>Chemical structure of 1,2-dimethylimidazole, showing a five-membered imidazole ring with methyl groups attached to the C1 and C2 positions. The nitrogen atom is highlighted in blue.</p>           |
| 21 | -3.74 | -2.23 |  <p>Chemical structure of 1,2,4-trimethylimidazole, showing a five-membered imidazole ring with methyl groups attached to the C1, C2, and C4 positions. The nitrogen atom is highlighted in blue.</p>  |
| 22 | -5.68 | -1.99 |  <p>Chemical structure of 1,2,5-trimethylimidazole, showing a five-membered imidazole ring with methyl groups attached to the C1, C2, and C5 positions. The nitrogen atom is highlighted in blue.</p> |

|    |       |       |                                                                                                                                                                                                                                    |
|----|-------|-------|------------------------------------------------------------------------------------------------------------------------------------------------------------------------------------------------------------------------------------|
| 23 | -6.08 | -1.99 | 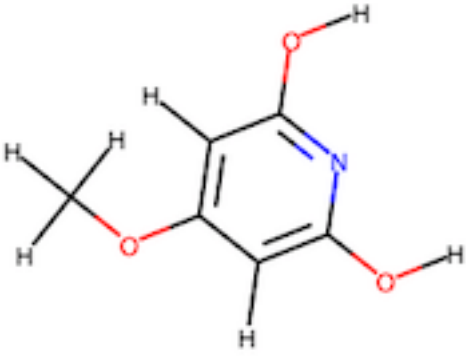 <p>Chemical structure of 2,4,6-trihydroxy-1,3,5-triazine, a triazine ring with three hydroxyl groups attached at the 2, 4, and 6 positions.</p> |
| 24 | -4.40 | -1.80 |  <p>Chemical structure of 4-chloro-1,3,5-triazine, a triazine ring with a chlorine atom attached at the 4 position.</p>                          |
| 25 | -4.47 | -1.69 |  <p>Chemical structure of 4-fluoro-1,3,5-triazine, a triazine ring with a fluorine atom attached at the 4 position.</p>                        |
| 26 | -4.23 | -1.86 |  <p>Chemical structure of 4-(difluoromethyl)-1,3,5-triazine, a triazine ring with a difluoromethyl group attached at the 4 position.</p>       |

|    |       |       |                                                                                      |
|----|-------|-------|--------------------------------------------------------------------------------------|
| 27 | -3.77 | -1.79 | 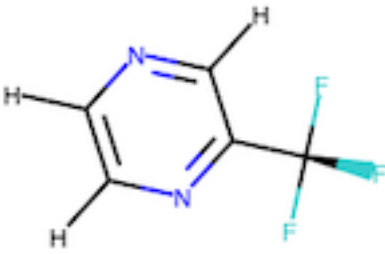   |
| 28 | -5.23 | -2.12 |    |
| 29 | -6.91 | -3.60 |  |
| 30 | -4.37 | -1.92 |  |



|    |       |       |                                                                                      |
|----|-------|-------|--------------------------------------------------------------------------------------|
| 31 | -3.96 | -2.22 | 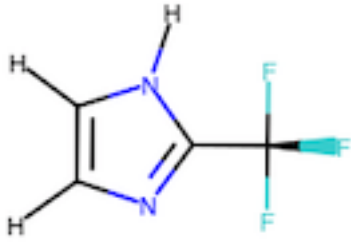   |
| 32 | -4.77 | -2.08 |    |
| 33 | -4.63 | -2.67 |  |
| 34 | -7.28 | -3.59 |  |

|    |       |       |                                                                                      |
|----|-------|-------|--------------------------------------------------------------------------------------|
| 35 | -3.83 | -1.70 | 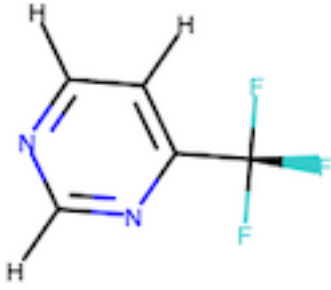   |
| 36 | -4.35 | -1.69 |    |
| 37 | -3.73 | -1.59 |   |
| 38 | -6.88 | -3.59 |  |
| 39 | -5.33 | -2.18 |  |

|    |       |       |  |
|----|-------|-------|--|
| 40 | -3.74 | -1.70 |  |
| 41 | -4.15 | -1.81 |  |
| 42 | -4.27 | -1.71 |  |
| 43 | -4.20 | -2.43 |  |
| 44 | -5.70 | -3.51 |  |

|    |       |       |                                                                                      |
|----|-------|-------|--------------------------------------------------------------------------------------|
| 45 | -4.10 | -1.64 | 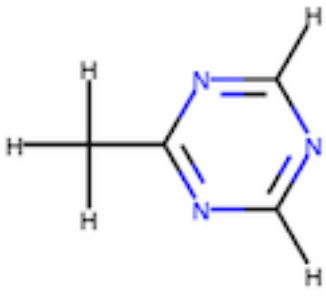   |
| 46 | -3.40 | -1.80 |    |
| 47 | -3.91 | -1.68 |   |
| 48 | -5.23 | -2.34 |  |
| 49 | -6.26 | -3.39 |  |

|    |       |       |  |
|----|-------|-------|--|
| 50 | -4.15 | -2.14 |  |
| 51 | -3.94 | -2.55 |  |
| 52 | -4.15 | -2.18 |  |
| 53 | -5.44 | -2.63 |  |
| 54 | -3.87 | -2.71 |  |

|    |       |       |                                                                                      |
|----|-------|-------|--------------------------------------------------------------------------------------|
| 55 | -6.82 | -3.82 | 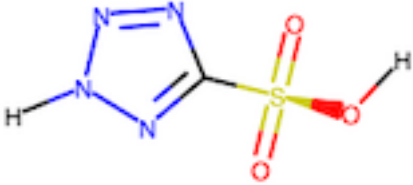   |
| 56 | -5.34 | -2.34 |    |
| 57 | -5.65 | -2.03 |   |
| 58 | -5.62 | -2.26 |  |

|    |       |       |                                                                                                                                                                                                                                                                                                                                                             |
|----|-------|-------|-------------------------------------------------------------------------------------------------------------------------------------------------------------------------------------------------------------------------------------------------------------------------------------------------------------------------------------------------------------|
| 59 | -5.30 | -2.38 | 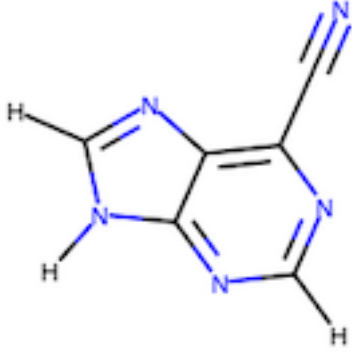 <p>Chemical structure of 4-cyanoimidazo[1,2-a]pyrimidine, a bicyclic heterocyclic compound consisting of an imidazole ring fused to a pyrimidine ring, with a cyano group (-C≡N) attached to the 4-position of the pyrimidine ring.</p>                                  |
| 60 | -5.41 | -2.51 |  <p>Chemical structure of 4-sulfamoylimidazo[1,2-a]pyrimidine, a bicyclic heterocyclic compound consisting of an imidazole ring fused to a pyrimidine ring, with a sulfamoyl group (-SO<sub>2</sub>NH<sub>2</sub>) attached to the 4-position of the pyrimidine ring.</p> |
| 61 | -5.53 | -2.25 |  <p>Chemical structure of 4,6-difluoroimidazo[1,2-a]pyrimidine, a bicyclic heterocyclic compound consisting of an imidazole ring fused to a pyrimidine ring, with two fluorine atoms (-F) attached to the 4 and 6 positions of the pyrimidine ring.</p>                 |
| 62 | -6.02 | -2.23 |  <p>Chemical structure of 4-methylimidazo[1,2-a]pyrimidine, a bicyclic heterocyclic compound consisting of an imidazole ring fused to a pyrimidine ring, with a methyl group (-CH<sub>3</sub>) attached to the 4-position of the pyrimidine ring.</p>                   |

|    |       |       |                                                                                                                                                                                                                                              |
|----|-------|-------|----------------------------------------------------------------------------------------------------------------------------------------------------------------------------------------------------------------------------------------------|
| 63 | -6.06 | -2.25 | 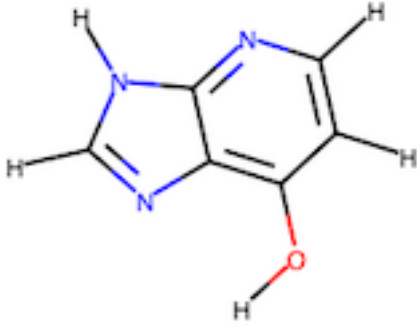 <p>Chemical structure of 5-hydroxytryptophan (5-HTP), a tryptophan derivative with a hydroxyl group at the 5-position of the indole ring system.</p>      |
| 64 | -5.46 | -2.28 |  <p>Chemical structure of 5-cyanotryptophan (5-CTP), a tryptophan derivative with a cyano group at the 5-position of the indole ring system.</p>          |
| 65 | -5.56 | -2.54 |  <p>Chemical structure of 5-sulfotryptophan (5-STP), a tryptophan derivative with a sulfonic acid group at the 5-position of the indole ring system.</p> |



|    |       |       |                                                                                      |
|----|-------|-------|--------------------------------------------------------------------------------------|
| 66 | -3.14 | -2.09 | 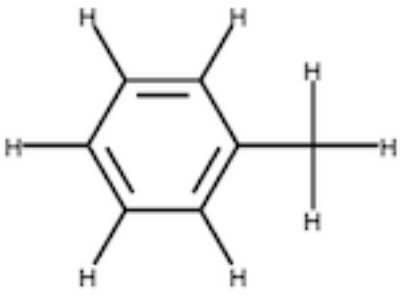   |
| 67 | -2.88 | -1.94 |    |
| 68 | -3.20 | -1.97 |  |

|    |       |       |                                                                                      |
|----|-------|-------|--------------------------------------------------------------------------------------|
| 69 | -3.42 | -2.06 | 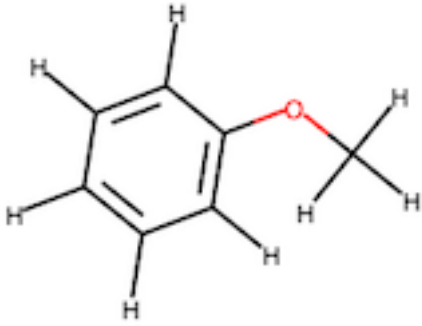   |
| 70 | -5.52 | -3.16 |    |
| 71 | -4.81 | -2.09 |  |
| 72 | -5.34 | -1.82 |  |

|    |       |       |                                                                                      |
|----|-------|-------|--------------------------------------------------------------------------------------|
| 73 | -4.43 | -1.86 | 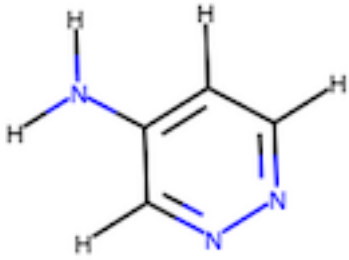   |
| 74 | -5.22 | -2.04 |    |
| 75 | -5.20 | -1.90 |   |
| 76 | -4.72 | -2.24 |  |
| 77 | -4.71 | -2.07 |  |

|    |       |       |                                                                                      |
|----|-------|-------|--------------------------------------------------------------------------------------|
| 78 | -5.79 | -2.33 | 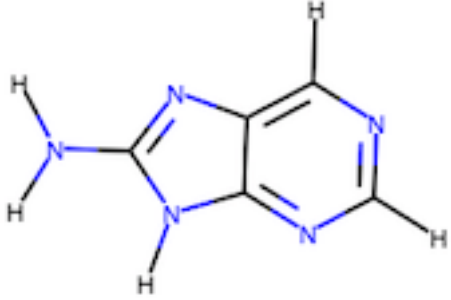   |
| 79 | -5.89 | -2.25 |    |
| 80 | -6.35 | -2.02 |   |
| 81 | -6.13 | -2.21 |  |

|    |       |       |                                                                                                                                                                                                                                                                                             |
|----|-------|-------|---------------------------------------------------------------------------------------------------------------------------------------------------------------------------------------------------------------------------------------------------------------------------------------------|
| 82 | -6.04 | -2.28 | 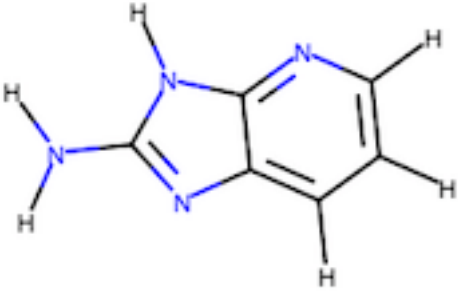 <p>Chemical structure of Adenine, a purine base, showing two fused rings (imidazole and pyrimidine) with two amino groups (-NH<sub>2</sub>) attached to the imidazole ring.</p>                          |
| 83 | -3.96 | -1.68 |  <p>Chemical structure of Guanine, a purine base, showing two fused rings (imidazole and pyrimidine) with a carbonyl group (=O) and an amino group (-NH<sub>2</sub>) attached to the pyrimidine ring.</p> |
| 84 | -4.04 | -1.69 |  <p>Chemical structure of Cytosine, a pyrimidine base, showing a single six-membered ring with two amino groups (-NH<sub>2</sub>) and one carbonyl group (=O) attached to the ring.</p>                 |
| 85 | -3.55 | -1.64 |  <p>Chemical structure of Thymine, a pyrimidine base, showing a single six-membered ring with two methyl groups (-CH<sub>3</sub>) and one carbonyl group (=O) attached to the ring.</p>                 |

|    |       |       |                                                                                                                                                                                                                                       |
|----|-------|-------|---------------------------------------------------------------------------------------------------------------------------------------------------------------------------------------------------------------------------------------|
| 86 | -3.57 | -1.67 | 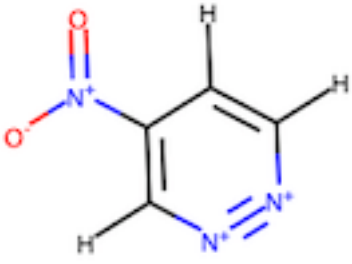 <p>Chemical structure of 2-nitroimidazole, a five-membered aromatic heterocycle with two nitrogen atoms and a nitro group at the 2-position.</p>   |
| 87 | -3.94 | -1.75 |  <p>Chemical structure of 4-nitroimidazole, a five-membered aromatic heterocycle with two nitrogen atoms and a nitro group at the 4-position.</p>   |
| 88 | -3.60 | -1.70 |  <p>Chemical structure of 5-nitroimidazole, a five-membered aromatic heterocycle with two nitrogen atoms and a nitro group at the 5-position.</p> |
| 89 | -3.41 | -2.01 |  <p>Chemical structure of 4-nitroimidazole, a five-membered aromatic heterocycle with two nitrogen atoms and a nitro group at the 4-position.</p> |

|    |       |       |                                                                                      |
|----|-------|-------|--------------------------------------------------------------------------------------|
| 90 | -4.54 | -2.53 | 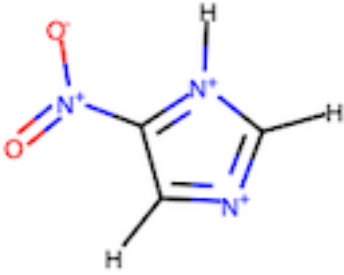   |
| 91 | -4.48 | -2.50 |    |
| 92 | -3.98 | -2.77 |  |
| 93 | -5.29 | -2.32 |  |

|    |       |       |                                                                                      |
|----|-------|-------|--------------------------------------------------------------------------------------|
| 94 | -5.02 | -2.57 | 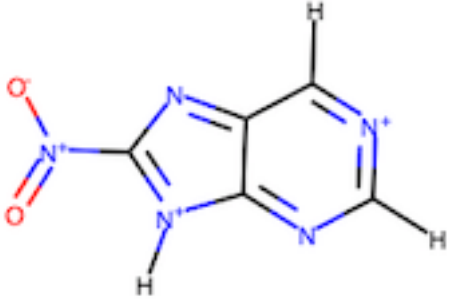   |
| 95 | -5.43 | -2.29 |    |
| 96 | -5.18 | -2.42 |  |
| 97 | -3.19 | -1.72 |  |



|     |       |       |                                                                                      |
|-----|-------|-------|--------------------------------------------------------------------------------------|
| 98  | -4.58 | -1.89 | 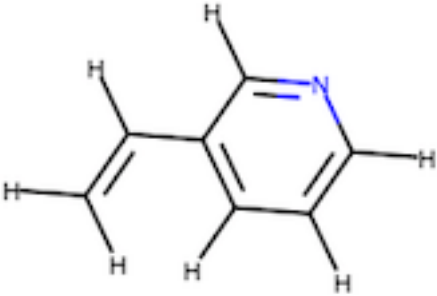   |
| 99  | -4.23 | -1.77 |    |
| 100 | -4.08 | -1.75 |  |

## Supplementary Note 10. XYZ Coordinates and Energies of all DFT-optimized Structures

Supplementary Table 14. Molecules for the three iterations of active learning for PI, SOAP, CM, and BoB. The first iteration corresponds to molecules 1-40. The second set corresponds to molecules 41-80, and 81-120 corresponds to the third.

|    | PI                        | SOAP                      | CM                        | BoB                       |
|----|---------------------------|---------------------------|---------------------------|---------------------------|
| 1  | dsgdb9nsd_127513babel.xyz | dsgdb9nsd_027520babel.xyz | dsgdb9nsd_025924babel.xyz | dsgdb9nsd_026572babel.xyz |
| 2  | dsgdb9nsd_128165babel.xyz | dsgdb9nsd_027869babel.xyz | dsgdb9nsd_047090babel.xyz | dsgdb9nsd_029567babel.xyz |
| 3  | dsgdb9nsd_128158babel.xyz | dsgdb9nsd_133433babel.xyz | dsgdb9nsd_109208babel.xyz | dsgdb9nsd_029370babel.xyz |
| 4  | dsgdb9nsd_004514babel.xyz | dsgdb9nsd_027402babel.xyz | dsgdb9nsd_032461babel.xyz | dsgdb9nsd_027400babel.xyz |
| 5  | dsgdb9nsd_031100babel.xyz | dsgdb9nsd_024869babel.xyz | dsgdb9nsd_083107babel.xyz | dsgdb9nsd_027341babel.xyz |
| 6  | dsgdb9nsd_026710babel.xyz | dsgdb9nsd_131288babel.xyz | dsgdb9nsd_112329babel.xyz | dsgdb9nsd_026726babel.xyz |
| 7  | dsgdb9nsd_031557babel.xyz | dsgdb9nsd_132338babel.xyz | dsgdb9nsd_049792babel.xyz | dsgdb9nsd_027752babel.xyz |
| 8  | dsgdb9nsd_028534babel.xyz | dsgdb9nsd_131350babel.xyz | dsgdb9nsd_077363babel.xyz | dsgdb9nsd_026935babel.xyz |
| 9  | dsgdb9nsd_031149babel.xyz | dsgdb9nsd_130136babel.xyz | dsgdb9nsd_100178babel.xyz | dsgdb9nsd_026844babel.xyz |
| 10 | dsgdb9nsd_004525babel.xyz | dsgdb9nsd_132936babel.xyz | dsgdb9nsd_081360babel.xyz | dsgdb9nsd_026918babel.xyz |
| 11 | dsgdb9nsd_026709babel.xyz | dsgdb9nsd_131348babel.xyz | dsgdb9nsd_083506babel.xyz | dsgdb9nsd_029231babel.xyz |
| 12 | dsgdb9nsd_127511babel.xyz | dsgdb9nsd_132225babel.xyz | dsgdb9nsd_124213babel.xyz | dsgdb9nsd_029350babel.xyz |
| 13 | dsgdb9nsd_029791babel.xyz | dsgdb9nsd_132178babel.xyz | dsgdb9nsd_107612babel.xyz | dsgdb9nsd_027943babel.xyz |
| 14 | dsgdb9nsd_026705babel.xyz | dsgdb9nsd_133443babel.xyz | dsgdb9nsd_046959babel.xyz | dsgdb9nsd_075879babel.xyz |
| 15 | dsgdb9nsd_027908babel.xyz | dsgdb9nsd_132238babel.xyz | dsgdb9nsd_047586babel.xyz | dsgdb9nsd_064609babel.xyz |
| 16 | dsgdb9nsd_028542babel.xyz | dsgdb9nsd_132241babel.xyz | dsgdb9nsd_062488babel.xyz | dsgdb9nsd_027090babel.xyz |
| 17 | dsgdb9nsd_029783babel.xyz | dsgdb9nsd_133430babel.xyz | dsgdb9nsd_092864babel.xyz | dsgdb9nsd_027657babel.xyz |
| 18 | dsgdb9nsd_129638babel.xyz | dsgdb9nsd_131047babel.xyz | dsgdb9nsd_045815babel.xyz | dsgdb9nsd_081088babel.xyz |
| 19 | dsgdb9nsd_004513babel.xyz | dsgdb9nsd_132938babel.xyz | dsgdb9nsd_093391babel.xyz | dsgdb9nsd_027710babel.xyz |
| 20 | dsgdb9nsd_027911babel.xyz | dsgdb9nsd_131401babel.xyz | dsgdb9nsd_099251babel.xyz | dsgdb9nsd_027132babel.xyz |
| 21 | dsgdb9nsd_026708babel.xyz | dsgdb9nsd_004517babel.xyz | dsgdb9nsd_076893babel.xyz | dsgdb9nsd_028123babel.xyz |
| 22 | dsgdb9nsd_028531babel.xyz | dsgdb9nsd_003940babel.xyz | dsgdb9nsd_067548babel.xyz | dsgdb9nsd_075871babel.xyz |
| 23 | dsgdb9nsd_128129babel.xyz | dsgdb9nsd_027913babel.xyz | dsgdb9nsd_054720babel.xyz | dsgdb9nsd_028926babel.xyz |
| 24 | dsgdb9nsd_028529babel.xyz | dsgdb9nsd_027915babel.xyz | dsgdb9nsd_022569babel.xyz | dsgdb9nsd_029491babel.xyz |
| 25 | dsgdb9nsd_005091babel.xyz | dsgdb9nsd_003942babel.xyz | dsgdb9nsd_093309babel.xyz | dsgdb9nsd_067147babel.xyz |
| 26 | dsgdb9nsd_025935babel.xyz | dsgdb9nsd_024868babel.xyz | dsgdb9nsd_045581babel.xyz | dsgdb9nsd_029459babel.xyz |
| 27 | dsgdb9nsd_025890babel.xyz | dsgdb9nsd_129986babel.xyz | dsgdb9nsd_076541babel.xyz | dsgdb9nsd_064556babel.xyz |
| 28 | dsgdb9nsd_021542babel.xyz | dsgdb9nsd_132062babel.xyz | dsgdb9nsd_045427babel.xyz | dsgdb9nsd_027836babel.xyz |
| 29 | dsgdb9nsd_129636babel.xyz | dsgdb9nsd_131408babel.xyz | dsgdb9nsd_076539babel.xyz | dsgdb9nsd_029163babel.xyz |
| 30 | dsgdb9nsd_004517babel.xyz | dsgdb9nsd_027515babel.xyz | dsgdb9nsd_082653babel.xyz | dsgdb9nsd_076218babel.xyz |
| 31 | dsgdb9nsd_029704babel.xyz | dsgdb9nsd_130054babel.xyz | dsgdb9nsd_076784babel.xyz | dsgdb9nsd_098949babel.xyz |
| 32 | dsgdb9nsd_029714babel.xyz | dsgdb9nsd_003937babel.xyz | dsgdb9nsd_112216babel.xyz | dsgdb9nsd_026613babel.xyz |
| 33 | dsgdb9nsd_003937babel.xyz | dsgdb9nsd_004244babel.xyz | dsgdb9nsd_112352babel.xyz | dsgdb9nsd_053993babel.xyz |

|    |                           |                           |                           |                           |
|----|---------------------------|---------------------------|---------------------------|---------------------------|
| 34 | dsgdb9nsd_028536babel.xyz | dsgdb9nsd_132935babel.xyz | dsgdb9nsd_127751babel.xyz | dsgdb9nsd_027917babel.xyz |
| 35 | dsgdb9nsd_129637babel.xyz | dsgdb9nsd_132233babel.xyz | dsgdb9nsd_045877babel.xyz | dsgdb9nsd_057173babel.xyz |
| 36 | dsgdb9nsd_028535babel.xyz | dsgdb9nsd_129502babel.xyz | dsgdb9nsd_053818babel.xyz | dsgdb9nsd_028927babel.xyz |
| 37 | dsgdb9nsd_129639babel.xyz | dsgdb9nsd_022906babel.xyz | dsgdb9nsd_046040babel.xyz | dsgdb9nsd_075737babel.xyz |
| 38 | dsgdb9nsd_021543babel.xyz | dsgdb9nsd_004532babel.xyz | dsgdb9nsd_116436babel.xyz | dsgdb9nsd_070169babel.xyz |
| 39 | dsgdb9nsd_131257babel.xyz | dsgdb9nsd_025890babel.xyz | dsgdb9nsd_080842babel.xyz | dsgdb9nsd_077806babel.xyz |
| 40 | dsgdb9nsd_026701babel.xyz | dsgdb9nsd_133431babel.xyz | dsgdb9nsd_081933babel.xyz | dsgdb9nsd_029326babel.xyz |
| 41 | dsgdb9nsd_027936babel.xyz | dsgdb9nsd_133426babel.xyz | dsgdb9nsd_028135babel.xyz | dsgdb9nsd_028837babel.xyz |
| 42 | dsgdb9nsd_003940babel.xyz | dsgdb9nsd_027936babel.xyz | dsgdb9nsd_028185babel.xyz | dsgdb9nsd_028125babel.xyz |
| 43 | dsgdb9nsd_003882babel.xyz | dsgdb9nsd_000860babel.xyz | dsgdb9nsd_027081babel.xyz | dsgdb9nsd_027202babel.xyz |
| 44 | dsgdb9nsd_004512babel.xyz | dsgdb9nsd_129389babel.xyz | dsgdb9nsd_067368babel.xyz | dsgdb9nsd_024471babel.xyz |
| 45 | dsgdb9nsd_031067babel.xyz | dsgdb9nsd_132800babel.xyz | dsgdb9nsd_029616babel.xyz | dsgdb9nsd_029461babel.xyz |
| 46 | dsgdb9nsd_027942babel.xyz | dsgdb9nsd_027908babel.xyz | dsgdb9nsd_028394babel.xyz | dsgdb9nsd_046168babel.xyz |
| 47 | dsgdb9nsd_004511babel.xyz | dsgdb9nsd_131359babel.xyz | dsgdb9nsd_131537babel.xyz | dsgdb9nsd_028178babel.xyz |
| 48 | dsgdb9nsd_004518babel.xyz | dsgdb9nsd_129223babel.xyz | dsgdb9nsd_022018babel.xyz | dsgdb9nsd_027432babel.xyz |
| 49 | dsgdb9nsd_004530babel.xyz | dsgdb9nsd_132628babel.xyz | dsgdb9nsd_029099babel.xyz | dsgdb9nsd_028986babel.xyz |
| 50 | dsgdb9nsd_021045babel.xyz | dsgdb9nsd_027653babel.xyz | dsgdb9nsd_131561babel.xyz | dsgdb9nsd_028836babel.xyz |
| 51 | dsgdb9nsd_031114babel.xyz | dsgdb9nsd_132612babel.xyz | dsgdb9nsd_080165babel.xyz | dsgdb9nsd_029492babel.xyz |
| 52 | dsgdb9nsd_129384babel.xyz | dsgdb9nsd_028534babel.xyz | dsgdb9nsd_131410babel.xyz | dsgdb9nsd_028980babel.xyz |
| 53 | dsgdb9nsd_030849babel.xyz | dsgdb9nsd_131273babel.xyz | dsgdb9nsd_066893babel.xyz | dsgdb9nsd_043555babel.xyz |
| 54 | dsgdb9nsd_030245babel.xyz | dsgdb9nsd_004085babel.xyz | dsgdb9nsd_028193babel.xyz | dsgdb9nsd_129855babel.xyz |
| 55 | dsgdb9nsd_131168babel.xyz | dsgdb9nsd_130160babel.xyz | dsgdb9nsd_029539babel.xyz | dsgdb9nsd_025222babel.xyz |
| 56 | dsgdb9nsd_031052babel.xyz | dsgdb9nsd_027911babel.xyz | dsgdb9nsd_131552babel.xyz | dsgdb9nsd_129912babel.xyz |
| 57 | dsgdb9nsd_031084babel.xyz | dsgdb9nsd_131343babel.xyz | dsgdb9nsd_131557babel.xyz | dsgdb9nsd_027441babel.xyz |
| 58 | dsgdb9nsd_025925babel.xyz | dsgdb9nsd_129388babel.xyz | dsgdb9nsd_027917babel.xyz | dsgdb9nsd_027221babel.xyz |
| 59 | dsgdb9nsd_021055babel.xyz | dsgdb9nsd_000880babel.xyz | dsgdb9nsd_029160babel.xyz | dsgdb9nsd_028984babel.xyz |
| 60 | dsgdb9nsd_004515babel.xyz | dsgdb9nsd_004514babel.xyz | dsgdb9nsd_131533babel.xyz | dsgdb9nsd_029060babel.xyz |
| 61 | dsgdb9nsd_003873babel.xyz | dsgdb9nsd_132642babel.xyz | dsgdb9nsd_123593babel.xyz | dsgdb9nsd_028987babel.xyz |
| 62 | dsgdb9nsd_030860babel.xyz | dsgdb9nsd_131357babel.xyz | dsgdb9nsd_027089babel.xyz | dsgdb9nsd_029051babel.xyz |
| 63 | dsgdb9nsd_029159babel.xyz | dsgdb9nsd_131371babel.xyz | dsgdb9nsd_081525babel.xyz | dsgdb9nsd_043603babel.xyz |
| 64 | dsgdb9nsd_031057babel.xyz | dsgdb9nsd_027912babel.xyz | dsgdb9nsd_128700babel.xyz | dsgdb9nsd_028832babel.xyz |
| 65 | dsgdb9nsd_005116babel.xyz | dsgdb9nsd_003882babel.xyz | dsgdb9nsd_029104babel.xyz | dsgdb9nsd_028299babel.xyz |
| 66 | dsgdb9nsd_004942babel.xyz | dsgdb9nsd_028521babel.xyz | dsgdb9nsd_029057babel.xyz | dsgdb9nsd_129861babel.xyz |
| 67 | dsgdb9nsd_131262babel.xyz | dsgdb9nsd_132379babel.xyz | dsgdb9nsd_047108babel.xyz | dsgdb9nsd_080207babel.xyz |
| 68 | dsgdb9nsd_031061babel.xyz | dsgdb9nsd_132607babel.xyz | dsgdb9nsd_054393babel.xyz | dsgdb9nsd_028656babel.xyz |
| 69 | dsgdb9nsd_030891babel.xyz | dsgdb9nsd_129236babel.xyz | dsgdb9nsd_032311babel.xyz | dsgdb9nsd_025841babel.xyz |
| 70 | dsgdb9nsd_027654babel.xyz | dsgdb9nsd_027918babel.xyz | dsgdb9nsd_132627babel.xyz | dsgdb9nsd_129916babel.xyz |
| 71 | dsgdb9nsd_031005babel.xyz | dsgdb9nsd_027914babel.xyz | dsgdb9nsd_132010babel.xyz | dsgdb9nsd_029053babel.xyz |
| 72 | dsgdb9nsd_031101babel.xyz | dsgdb9nsd_132652babel.xyz | dsgdb9nsd_028896babel.xyz | dsgdb9nsd_043428babel.xyz |

|     |                           |                           |                           |                           |
|-----|---------------------------|---------------------------|---------------------------|---------------------------|
| 73  | dsgdb9nsd_030861babel.xyz | dsgdb9nsd_022030babel.xyz | dsgdb9nsd_029470babel.xyz | dsgdb9nsd_024535babel.xyz |
| 74  | dsgdb9nsd_004532babel.xyz | dsgdb9nsd_028546babel.xyz | dsgdb9nsd_045918babel.xyz | dsgdb9nsd_024534babel.xyz |
| 75  | dsgdb9nsd_031063babel.xyz | dsgdb9nsd_028535babel.xyz | dsgdb9nsd_028254babel.xyz | dsgdb9nsd_027443babel.xyz |
| 76  | dsgdb9nsd_030850babel.xyz | dsgdb9nsd_028533babel.xyz | dsgdb9nsd_045949babel.xyz | dsgdb9nsd_029048babel.xyz |
| 77  | dsgdb9nsd_021210babel.xyz | dsgdb9nsd_026710babel.xyz | dsgdb9nsd_130326babel.xyz | dsgdb9nsd_130170babel.xyz |
| 78  | dsgdb9nsd_030906babel.xyz | dsgdb9nsd_129222babel.xyz | dsgdb9nsd_023299babel.xyz | dsgdb9nsd_024529babel.xyz |
| 79  | dsgdb9nsd_028547babel.xyz | dsgdb9nsd_132390babel.xyz | dsgdb9nsd_098142babel.xyz | dsgdb9nsd_024497babel.xyz |
| 80  | dsgdb9nsd_131334babel.xyz | dsgdb9nsd_132802babel.xyz | dsgdb9nsd_127750babel.xyz | dsgdb9nsd_024498babel.xyz |
| 81  | dsgdb9nsd_020994babel.xyz | dsgdb9nsd_132656babel.xyz | dsgdb9nsd_130318babel.xyz | dsgdb9nsd_024531babel.xyz |
| 82  | dsgdb9nsd_004465babel.xyz | dsgdb9nsd_029433babel.xyz | dsgdb9nsd_130616babel.xyz | dsgdb9nsd_024500babel.xyz |
| 83  | dsgdb9nsd_004482babel.xyz | dsgdb9nsd_000854babel.xyz | dsgdb9nsd_026432babel.xyz | dsgdb9nsd_024504babel.xyz |
| 84  | dsgdb9nsd_031645babel.xyz | dsgdb9nsd_027745babel.xyz | dsgdb9nsd_129794babel.xyz | dsgdb9nsd_024527babel.xyz |
| 85  | dsgdb9nsd_126708babel.xyz | dsgdb9nsd_004294babel.xyz | dsgdb9nsd_130491babel.xyz | dsgdb9nsd_028115babel.xyz |
| 86  | dsgdb9nsd_004553babel.xyz | dsgdb9nsd_026843babel.xyz | dsgdb9nsd_030380babel.xyz | dsgdb9nsd_024472babel.xyz |
| 87  | dsgdb9nsd_126772babel.xyz | dsgdb9nsd_004669babel.xyz | dsgdb9nsd_029957babel.xyz | dsgdb9nsd_030226babel.xyz |
| 88  | dsgdb9nsd_030791babel.xyz | dsgdb9nsd_027753babel.xyz | dsgdb9nsd_127713babel.xyz | dsgdb9nsd_030247babel.xyz |
| 89  | dsgdb9nsd_004547babel.xyz | dsgdb9nsd_004530babel.xyz | dsgdb9nsd_129974babel.xyz | dsgdb9nsd_027766babel.xyz |
| 90  | dsgdb9nsd_031502babel.xyz | dsgdb9nsd_132457babel.xyz | dsgdb9nsd_049599babel.xyz | dsgdb9nsd_030259babel.xyz |
| 91  | dsgdb9nsd_005113babel.xyz | dsgdb9nsd_132632babel.xyz | dsgdb9nsd_075292babel.xyz | dsgdb9nsd_028334babel.xyz |
| 92  | dsgdb9nsd_031095babel.xyz | dsgdb9nsd_129489babel.xyz | dsgdb9nsd_133390babel.xyz | dsgdb9nsd_024324babel.xyz |
| 93  | dsgdb9nsd_022249babel.xyz | dsgdb9nsd_004381babel.xyz | dsgdb9nsd_128118babel.xyz | dsgdb9nsd_028504babel.xyz |
| 94  | dsgdb9nsd_031776babel.xyz | dsgdb9nsd_028197babel.xyz | dsgdb9nsd_133235babel.xyz | dsgdb9nsd_024495babel.xyz |
| 95  | dsgdb9nsd_004478babel.xyz | dsgdb9nsd_132312babel.xyz | dsgdb9nsd_075126babel.xyz | dsgdb9nsd_105980babel.xyz |
| 96  | dsgdb9nsd_026329babel.xyz | dsgdb9nsd_132673babel.xyz | dsgdb9nsd_039609babel.xyz | dsgdb9nsd_031875babel.xyz |
| 97  | dsgdb9nsd_126782babel.xyz | dsgdb9nsd_004717babel.xyz | dsgdb9nsd_025111babel.xyz | dsgdb9nsd_029747babel.xyz |
| 98  | dsgdb9nsd_030858babel.xyz | dsgdb9nsd_028089babel.xyz | dsgdb9nsd_132113babel.xyz | dsgdb9nsd_029815babel.xyz |
| 99  | dsgdb9nsd_029832babel.xyz | dsgdb9nsd_027387babel.xyz | dsgdb9nsd_127525babel.xyz | dsgdb9nsd_024470babel.xyz |
| 100 | dsgdb9nsd_003871babel.xyz | dsgdb9nsd_027707babel.xyz | dsgdb9nsd_029874babel.xyz | dsgdb9nsd_024502babel.xyz |
| 101 | dsgdb9nsd_033118babel.xyz | dsgdb9nsd_028754babel.xyz | dsgdb9nsd_040543babel.xyz | dsgdb9nsd_029829babel.xyz |
| 102 | dsgdb9nsd_030228babel.xyz | dsgdb9nsd_132386babel.xyz | dsgdb9nsd_050304babel.xyz | dsgdb9nsd_024530babel.xyz |
| 103 | dsgdb9nsd_004468babel.xyz | dsgdb9nsd_028001babel.xyz | dsgdb9nsd_028140babel.xyz | dsgdb9nsd_024536babel.xyz |
| 104 | dsgdb9nsd_004920babel.xyz | dsgdb9nsd_129524babel.xyz | dsgdb9nsd_024262babel.xyz | dsgdb9nsd_024501babel.xyz |
| 105 | dsgdb9nsd_003877babel.xyz | dsgdb9nsd_027654babel.xyz | dsgdb9nsd_045018babel.xyz | dsgdb9nsd_028798babel.xyz |
| 106 | dsgdb9nsd_030894babel.xyz | dsgdb9nsd_000857babel.xyz | dsgdb9nsd_029935babel.xyz | dsgdb9nsd_028483babel.xyz |
| 107 | dsgdb9nsd_030880babel.xyz | dsgdb9nsd_021881babel.xyz | dsgdb9nsd_130207babel.xyz | dsgdb9nsd_024468babel.xyz |
| 108 | dsgdb9nsd_030892babel.xyz | dsgdb9nsd_025826babel.xyz | dsgdb9nsd_025223babel.xyz | dsgdb9nsd_029935babel.xyz |
| 109 | dsgdb9nsd_030843babel.xyz | dsgdb9nsd_004279babel.xyz | dsgdb9nsd_028186babel.xyz | dsgdb9nsd_032177babel.xyz |
| 110 | dsgdb9nsd_031017babel.xyz | dsgdb9nsd_025791babel.xyz | dsgdb9nsd_082158babel.xyz | dsgdb9nsd_032278babel.xyz |
| 111 | dsgdb9nsd_031040babel.xyz | dsgdb9nsd_028759babel.xyz | dsgdb9nsd_094427babel.xyz | dsgdb9nsd_032279babel.xyz |

|     |                           |                           |                           |                           |
|-----|---------------------------|---------------------------|---------------------------|---------------------------|
| 112 | dsgdb9nsd_027725babel.xyz | dsgdb9nsd_021887babel.xyz | dsgdb9nsd_127524babel.xyz | dsgdb9nsd_026733babel.xyz |
| 113 | dsgdb9nsd_005110babel.xyz | dsgdb9nsd_004749babel.xyz | dsgdb9nsd_027116babel.xyz | dsgdb9nsd_029823babel.xyz |
| 114 | dsgdb9nsd_027730babel.xyz | dsgdb9nsd_027917babel.xyz | dsgdb9nsd_131418babel.xyz | dsgdb9nsd_032281babel.xyz |
| 115 | dsgdb9nsd_131278babel.xyz | dsgdb9nsd_026810babel.xyz | dsgdb9nsd_127511babel.xyz | dsgdb9nsd_028170babel.xyz |
| 116 | dsgdb9nsd_031089babel.xyz | dsgdb9nsd_132391babel.xyz | dsgdb9nsd_030004babel.xyz | dsgdb9nsd_026757babel.xyz |
| 117 | dsgdb9nsd_004459babel.xyz | dsgdb9nsd_132305babel.xyz | dsgdb9nsd_030370babel.xyz | dsgdb9nsd_027987babel.xyz |
| 118 | dsgdb9nsd_022592babel.xyz | dsgdb9nsd_026804babel.xyz | dsgdb9nsd_029944babel.xyz | dsgdb9nsd_032172babel.xyz |
| 119 | dsgdb9nsd_000880babel.xyz | dsgdb9nsd_027393babel.xyz | dsgdb9nsd_024201babel.xyz | dsgdb9nsd_029874babel.xyz |
| 120 | dsgdb9nsd_027671babel.xyz | dsgdb9nsd_026840babel.xyz | dsgdb9nsd_133257babel.xyz | dsgdb9nsd_027292babel.xyz |

## Supplementary References

- (1) Maroon, C. R.; Townsend, J.; Gmernicki, K. R.; Harrigan, D. J.; Sundell, B. J.; Lawrence, J. A.; Mahurin, S. M.; Vogiatzis, K. D.; Long, B. K. Elimination of CO<sub>2</sub>/N<sub>2</sub> Langmuir Sorption and Promotion of “n<sub>2</sub>-Phobicity” within High- T<sub>g</sub> Glassy Membranes. *Macromolecules* **2019**, *52* (4), 1589–1600.
- (2) Jorgensen, W. L.; Maxwell, D. S.; Tirado-Rives, J. Development and Testing of the OPLS All-Atom Force Field on Conformational Energetics and Properties of Organic Liquids. *J. Am. Chem. Soc.* **1996**, *118* (45), 11225–11236.
- (3) Dodda, L. S.; De Vaca, I. C.; Tirado-Rives, J.; Jorgensen, W. L. LigParGen Web Server: An Automatic OPLS-AA Parameter Generator for Organic Ligands. *Nucleic Acids Res.* **2017**, *45* (W1), W331–W336.
- (4) Plimpton, S. Fast Parallel Algorithms for Short-Range Molecular Dynamics. *J. Comput. Phys.* **1995**, *117* (1), 1–19.
- (5) Furche, F.; Ahlrichs, R.; Hättig, C.; Klopper, W.; Sierka, M.; Weigend, F. Turbomole. *Wiley Interdiscip. Rev. Comput. Mol. Sci.* **2014**, *4* (2), 91–100.
- (6) Adamo, C.; Barone, V. Toward Reliable Density Functional Methods without Adjustable Parameters: The PBE0 Model. *J. Chem. Phys.* **1999**, *110* (13), 6158–6170.
- (7) Weigend, F.; Ahlrichs, R. Balanced Basis Sets of Split Valence, Triple Zeta Valence and Quadruple Zeta Valence Quality for H to Rn: Design and Assessment of Accuracy. *Phys. Chem. Chem. Phys.* **2005**, *7* (18), 3297–3305.
- (8) Grimme, S.; Antony, J.; Ehrlich, S.; Krieg, H. A Consistent and Accurate Ab Initio Parametrization of Density Functional Dispersion Correction (DFT-D) for the 94 Elements H-Pu. *J. Chem. Phys.* **2010**, *132* (15), 154104.
- (9) Grimme, S.; Ehrlich, S.; Goerigk, L. Effect of the Damping Function in Dispersion Corrected Density Functional Theory. *J. Comput. Chem.* **2011**, *32* (7), 1456–1465.
- (10) Mavrandonakis, A.; Vogiatzis, K. D.; Boese, A. D.; Fink, K.; Heine, T.; Klopper, W. Ab Initio Study of the Adsorption of Small Molecules on Metal-Organic Frameworks with Oxo-Centered Trimetallic Building Units: The Role of the Undercoordinated Metal Ion. *Inorg. Chem.* **2015**, *54* (17), 8251–8263.
- (11) Vogiatzis, K. D.; Klopper, W.; Friedrich, J. Non-Covalent Interactions of CO<sub>2</sub> with Functional Groups of Metal-Organic Frameworks from a CCSD(T) Scheme Applicable to Large Systems. *J. Chem. Theory Comput.* **2015**, *11* (4), 1574–1584.
- (12) Hättig, C. Optimization of Auxiliary Basis Sets for RI-MP2 and RI-CC2 Calculations: Core-Valence and Quintuple- $\zeta$  Basis Sets for H to Ar and QZVPP Basis Sets for Li to Kr. *Phys. Chem. Chem. Phys.* **2005**, *7* (1), 59–66.
- (13) Bauer, U. Ripser: Efficient Computation of Vietoris-Rips Persistence Barcodes. **2019**, 1–16.
- (14) Saul, N. Persim. <https://pypi.org/project/persim/>.
- (15) Jin, Z.; Du, X.; Xu, Y.; Deng, Y.; Liu, M.; Zhao, Y.; Zhang, B.; Li, X.; Zhang, L.; Peng, C.; et al. Structure of Mpro from COVID-19 Virus and Discovery of Its Inhibitors. *bioRxiv* **2020**, <https://doi.org/10.1101/2020.02.26.964882>.
- (16) Pedregosa, F.; Michel, V.; Grisel, O.; Blondel, M.; Prettenhofer, P.; Weiss, R.; Vanderplas, J.; Cournapeau, D.; Varoquaux, G.; Gramfort, A.; et al. Scikit-Learn: Machine Learning in Python. *J. Mach. Learn. Res.* **2011**, *12*, 2825–2830.
- (17) Bartók, A. P.; Kondor, R.; Csányi, G. On Representing Chemical Environments. *Phys. Rev. B - Condens. Matter Mater. Phys.* **2013**, *87* (18), 1–16.

- (18) Himanen, L.; Jäger, M. O. J.; Morooka, E. V.; Federici Canova, F.; Ranawat, Y. S.; Gao, D. Z.; Rinke, P.; Foster, A. S. Dscribe: Library of Descriptors for Machine Learning in Materials Science. *Comput. Phys. Commun.* **2020**, *247*, 106949.
- (19) De, S.; Bartók, A. P.; Csányi, G.; Ceriotti, M. Comparing Molecules and Solids across Structural and Alchemical Space. *Phys. Chem. Chem. Phys.* **2016**, *18* (20), 13754–13769.
- (20) Hansen, K.; Biegler, F.; Ramakrishnan, R.; Pronobis, W.; Von Lilienfeld, O. A.; Müller, K. R.; Tkatchenko, A. Machine Learning Predictions of Molecular Properties: Accurate Many-Body Potentials and Nonlocality in Chemical Space. *J. Phys. Chem. Lett.* **2015**, *6* (12), 2326–2331.
- (21) Rupp, M.; Tkatchenko, A.; Müller, K.-R.; Anatole Von Lilienfeld, O. Fast and Accurate Modeling of Molecular Atomization Energies with Machine Learning. *Phys. Rev. Lett.* **2012**, *108* (5), 058301.
- (22) Christensen, A. S.; Faber, F. A.; Von Lilienfeld, O. A. Operators in Quantum Machine Learning: Response Properties in Chemical Space. *J. Chem. Phys.* **2019**, *150* (6), 1–15.
- (23) Christensen, A.; Faber, F. A.; Bratholm, L.; Tkatchenko, A.; Muller, K.; Von Lilienfeld, O. A. Qml: A python toolkit for quantum machine learning.
